# Supplementary material
Source: PubMed Central journal article supplement (PMC3241574)
Supplement: supp_mcr246_mcr246supp.pdf [file supp_mcr246_mcr246supp.pdf]

## SUPPLEMENTARY DATA

TABLE S1. List of quantitative real-time PCR primers

| Gene loci     | Primer          | For cDNA amplification(5' to 3') | Length (bp) |
|---------------|-----------------|----------------------------------|-------------|
| Glyma02g13070 | Glyma02g13070-F | GAACAGTGGGATGGCGTGAC             | 20          |
|               | Glyma02g13070-R | GGAAAAGGAGGTGCGGTGA              | 19          |
| Glyma02g45950 | Glyma02g45950-F | TGGAGTACAAGGCTAGTTGTC            | 21          |
|               | Glyma02g45950-R | ATCGCTGGTTATTAAGTAACCT           | 22          |
| Glyma03g35190 | Glyma03g35190-F | CCAACAAGATGCTGCTAACGA            | 21          |
|               | Glyma03g35190-R | CAAAGAGGCCGAGTGAGATG             | 20          |
| Glyma03g35200 | Glyma03g35200-F | GTAACCCAAGGCAACCACGAG            | 21          |
|               | Glyma03g35200-R | CACGGGGCATGAATCAATACTACA         | 24          |
| Glyma04g37180 | Glyma04g37180-F | CAATGGGAAGGGAAAGTTT              | 19          |
|               | Glyma04g37180-R | TAGTCGAGAGATCCCTGTAAAGAC         | 24          |
| Glyma05g03320 | Glyma05g03320-F | GGTAGTGGCCTGGTTGGTCC             | 20          |
|               | Glyma05g03320-R | GAAGGGGTGGCTGTGATGG              | 19          |
| Glyma05g26920 | Glyma05g26920-F | ATCCTAACAGCTTCACGCAA             | 20          |
|               | Glyma05g26920-R | GCTCAAAGCTCAAATGTCAT             | 20          |
| Glyma05g26930 | Glyma05g26930-F | AAATGGAGGTCCCTCTGGC              | 19          |
|               | Glyma05g26930-R | AGGGTGCATACTACAGCTACTGC          | 23          |
| Glyma05g33630 | Glyma05g33630-F | TCGGCTTCTCCCTATCCTTCA            | 21          |
|               | Glyma05g33630-R | CGCCTCTTCGGTTCATTCT              | 20          |
| Glyma05g33640 | Glyma05g33640-F | TTTTTCGTGTTTCAGTGGTTGC           | 21          |
|               | Glyma05g33640-R | AAAGGAGTTAAAGACAGAGCGT           | 22          |
| Glyma06g03100 | Glyma06g03100-F | GAACACCTCAGGCTCCCAACA            | 21          |
|               | Glyma06g03100-R | CCAAGCAAATGGGCTCACAA             | 20          |
| Glyma06g17860 | Glyma06g17860-F | TCCATTATAGCAGTCCCTTTTGTG         | 24          |
|               | Glyma06g17860-R | TGGTTCCTCTACCCAGCCAAT            | 21          |
| Glyma08g06090 | Glyma08g06090-F | CTATGTAATGTTTAGAGCATTGAG         | 24          |
|               | Glyma08g06090-R | CACAATAACGTCTCTTGCATC            | 21          |
| Glyma08g09880 | Glyma08g09880-F | CTCGGGACAAGAAACAAAAGT            | 22          |
|               | Glyma08g09880-R | CAAACCAGATGGGGAGATGATAG          | 23          |
| Glyma08g09900 | Glyma08g09900-F | TTCGGCAATGCCATCC                 | 16          |
|               | Glyma08g09900-R | TTCGCAGTTGAAAATGCTCT             | 20          |
| Glyma08g09910 | Glyma08g09910-F | CGTGCTACCGAAGTTTGAGA             | 20          |
|               | Glyma08g09910-R | TTGGGTTGCCCTGCTAA                | 17          |
| Glyma08g40210 | Glyma08g40210-F | GGTTTTAAGTGGCAGTTTGG             | 20          |
|               | Glyma08g40210-R | GCAACAATGGAGCTTTCTGA             | 20          |
| Glyma08g42670 | Glyma08g42670-F | GGGTCCTTGGAGTGAGTAAA             | 20          |
|               | Glyma08g42670-R | CCCACAACCTCGCAACAAT              | 18          |
| Glyma08g46550 | Glyma08g46550-F | TGGGGATGGGGGCAACAGA              | 19          |
|               | Glyma08g46550-R | GGCGATCCCAACAAAACCTACTCACTT      | 27          |
| Glyma09g36360 | Glyma09g36360-R | CACAGCCAGAGTATTCTTCATTCC         | 24          |
|               | Glyma09g36360-R | AGCAACTCCGTCTTGATTTCG            | 21          |

|               |                 |                              |    |
|---------------|-----------------|------------------------------|----|
| Glyma10g08300 | Glyma10g08300-F | GCTGATGGTGTGTTGGATTG         | 19 |
|               | Glyma10g08300-R | TGTTGGGTGTCAAAGTTGAG         | 20 |
| Glyma11g36510 | Glyma11g36510-F | CCAGTTTCAGGCCCAAGAGC         | 21 |
|               | Glyma11g36510-R | CCCCAGTGCCATTAGTAAGATAGAGGTT | 28 |
| Glyma12g01000 | Glyma12g01000-F | AAGATGGAGTTGCTGTGGAG         | 20 |
|               | Glyma12g01000-R | GTGAAACATGAGCAGTGGAAT        | 21 |
| Glyma12g34960 | Glyma12g34960-F | CAGATACTGGCATCCTGTTGA        | 21 |
|               | Glyma12g34960-R | AACTGACACCGAGGGCAAC          | 19 |
| Glyma13g23090 | Glyma13g23090-F | AACCAGTATTGGGGAAGCA          | 19 |
|               | Glyma13g23090-R | CGCTCGGAGACTATTGAACTA        | 21 |
| Glyma13g35610 | Glyma13g35610-F | TCTTCCGAATGTGGCTGTGG         | 20 |
|               | Glyma13g35610-R | GCCTGAAGGGGAAACAAATACA       | 22 |
| Glyma14g02790 | Glyma14g02790-F | CTCAGAACTACGTGGATTAGC        | 21 |
|               | Glyma14g02790-R | CATGCACCAGCACAACC            | 17 |
| Glyma17g11790 | Glyma17g11790-F | ATTGATGAAGTTGCCAGCATG        | 21 |
|               | Glyma17g11790-R | GCATTTGCTCACTCAGACAC         | 21 |
| Glyma18g00410 | Glyma18g00410-F | AACCCATGCACTGTGGATTTG        | 21 |
|               | Glyma18g00410-R | GCTTGATTGGTGGCAGTTTT         | 21 |
| Glyma18g17580 | Glyma18g17580-F | TCAGATGATGACGAATGGGATG       | 22 |
|               | Glyma18g17580-R | GGCAGGTGGAAGCATTGAAGT        | 21 |
| Glyma19g03220 | Glyma19g03220-F | GATGGGATGGGTGGGGAAGTTTAT     | 25 |
|               | Glyma19g03220-R | CCAAGGGGTTACACTACGGTCTACT    | 27 |
| Glyma19g37850 | Glyma19g37850-F | TACAGGTGCGGAGGGTCAGGT        | 21 |
|               | Glyma19g37850-R | TTGGGAATCGGCATAGGATAGGT      | 23 |
| Glyma19g37860 | Glyma19g37860-F | CGCCCCGTGGTACAACCTCTAA       | 21 |
|               | Glyma19g37860-R | GCCCTGCAAAAACAACATCAAC       | 22 |
| Glyma20g01470 | Glyma20g01470-F | GGTCAAGGTTTCATGTCTGTT        | 21 |
|               | Glyma20g01470-R | TGGACTTAGTCACTTTCCAATG       | 22 |
| Glyma20g03260 | Glyma20g03260-F | TGTGAGATTTCCACTCGTTT         | 20 |
|               | Glyma20g03260-R | GTGTATGGTCTCATCCAACA         | 20 |

---

TABLE S2. Domain organization of the 35 GmPAPs

| Gene loci     | Proposed name | Motif |       |      |      |      | No. of potential N-glycosylation sites | pI   | Previous name |
|---------------|---------------|-------|-------|------|------|------|----------------------------------------|------|---------------|
| Glyma02g13070 | GmPAP1        | GDMG  | GDICY | GNHE | –    | –    | 4                                      | 6.21 | –             |
| Glyma02g45950 | GmPAP2        | GDLG  | GDLSY | GNHE | VLFH | GHVH | 1                                      | 5.72 | –             |
| Glyma03g35190 | GmPAP3        | GDLG  | GDLSY | GNHE | VLLH | GHVH | 1                                      | 5.45 | –             |
| Glyma03g35200 | GmPAP4        | GDLG  | GDLSY | GNHE | VLIH | GHVH | 3                                      | 6.00 | –             |
| Glyma04g37180 | GmPAP5        | GAFN  | EDMPY | GNHE | FSAH | GHVH | 1                                      | 5.33 | –             |
| Glyma05g03320 | GmPAP6        | GDMG  | GDLTY | GNHE | FAAH | GHVH | 4                                      | 5.91 | –             |
| Glyma05g26920 | GmPAP7        | TKWS  | DDPAF | GNHD | VVGH | GQDH | 0                                      | 6.60 | –             |
| Glyma05g26930 | GmPAP8        | GDWG  | GDNFY | GNHD | VVGH | GHDH | 2                                      | 5.41 | –             |
| Glyma05g33630 | GmPAP9        | GDWG  | GDNFY | GNHD | VVGH | GHDH | 1                                      | 5.72 | –             |
| Glyma05g33640 | GmPAP10       | GDWG  | GDNFY | GNHD | VVGH | GHDH | 1                                      | 6.41 | –             |
| Glyma06g03100 | GmPAP11       | GDLG  | GDLSY | GNHE | VLMH | GHVH | 10                                     | 6.19 | –             |
| Glyma06g17860 | GmPAP12       | GDMG  | GDMPY | GNHE | FSAH | GHVH | 5                                      | 5.80 | –             |
| Glyma08g06090 | GmPAP13       | GDWG  | GDNFY | GNHD | VVGH | GHDH | 1                                      | 5.47 | –             |
| Glyma08g09880 | GmPAP14       | GDWG  | GDNFY | GNHD | VVGH | GHDH | 2                                      | 5.40 | –             |
| Glyma08g09900 | GmPAP15       | GDWG  | GDNFY | GNHD | VIGH | GHDH | 1                                      | 6.91 | GmPAP2        |
| Glyma08g09910 | GmPAP16       | GDWG  | GDNFY | GNHD | VVGH | GHDH | 1                                      | 5.88 | –             |
| Glyma08g40210 | GmPAP17       | GDLG  | GDLCY | GNHE | FLAH | GHVH | 3                                      | 5.99 | –             |
| Glyma08g42670 | GmPAP18       | GDLG  | GDLSY | GNHE | VLFH | GHVH | 1                                      | 5.66 | –             |
| Glyma08g46550 | GmPAP19       | GDLG  | GDVTY | GNHE | VTWH | GHVH | 4                                      | 5.30 | –             |
| Glyma09g36360 | GmPAP20       | GDLG  | GDLSY | GNHE | VLMH | GHVH | 5                                      | 5.88 | –             |
| Glyma10g08300 | GmPAP21       | GDLG  | GDLSY | GNHE | ALLH | GHVH | 2                                      | 6.02 | –             |
| Glyma11g36510 | GmPAP22       | GDLG  | GDVSY | GNHE | ATWH | GHVH | 6                                      | 4.77 | –             |
| Glyma12g01000 | GmPAP23       | GDLG  | GDLSY | GNHE | VLMH | GHVH | 5                                      | 6.05 | GmPAP1        |
| Glyma12g34960 | GmPAP24       | GDLG  | GDLSY | GNHE | VLVH | GHVH | 4                                      | 6.19 | –             |
| Glyma13g23090 | GmPAP25       | GDLG  | GDLSY | GNHE | VLVH | GHVH | 2                                      | 6.29 | –             |
| Glyma13g35610 | GmPAP26       | GDLG  | GDLSY | GNHE | VLVH | GHVH | 4                                      | 6.18 | –             |
| Glyma14g02790 | GmPAP27       | GDLG  | GDLSY | GNHE | VLFH | GHVH | 1                                      | 5.69 | –             |
| Glyma17g11790 | GmPAP28       | GDLG  | GDLSY | GNHE | VLMH | GHVH | 4                                      | 8.10 | GmPAP3        |
| Glyma18g00410 | GmPAP29       | GDLG  | GDVTY | GNHE | VTWH | GHVH | 6                                      | 4.97 | GmPhy         |
| Glyma18g17580 | GmPAP30       | GDMG  | GDLSY | GNHE | FLAH | GHVH | 3                                      | 5.41 | –             |
| Glyma19g03220 | GmPAP31       | GDLG  | GDITY | GNHE | AAWH | GHVH | 5                                      | 5.34 | –             |
| Glyma19g37850 | GmPAP32       | GDLG  | GDLSY | GNHE | VLLH | GHVH | 1                                      | 5.21 | –             |
| Glyma19g37860 | GmPAP33       | GDLG  | GDLSY | GNHE | VLIH | GHVH | 1                                      | 6.19 | –             |
| Glyma20g01470 | GmPAP34       | GDWG  | GDNFY | GNHD | AVGH | GHDH | 3                                      | 9.31 | –             |
| Glyma20g03260 | GmPAP35       | GDMG  | GDISY | GNHE | VQGH | GHVH | 6                                      | 5.89 | –             |

TABLE S3. Expression specificity of *GmPAP* genes across six different tissues under normal P treatments

| Gene loci     | Proposed name | Root | Stem | Leaf | Flower | Pod | Seed |
|---------------|---------------|------|------|------|--------|-----|------|
| Glyma02g13070 | GmPAP1        |      |      | +    |        |     |      |
| Glyma02g45950 | GmPAP2        |      |      |      |        |     |      |
| Glyma03g35190 | GmPAP3        |      |      |      |        |     |      |
| Glyma03g35200 | GmPAP4        |      |      |      |        |     |      |
| Glyma04g37180 | GmPAP5        |      |      |      |        |     |      |
| Glyma05g03320 | GmPAP6        |      |      | +    |        |     |      |
| Glyma05g26920 | GmPAP7        | +++  |      |      |        |     |      |
| Glyma05g26930 | GmPAP8        | +    |      |      |        |     |      |
| Glyma05g33630 | GmPAP9        |      |      |      |        |     |      |
| Glyma05g33640 | GmPAP10       |      |      |      | +      |     |      |
| Glyma06g03100 | GmPAP11       |      |      |      |        |     | ++++ |
| Glyma06g17860 | GmPAP12       |      |      |      |        |     |      |
| Glyma08g06090 | GmPAP13       |      |      |      | +      |     |      |
| Glyma08g09880 | GmPAP14       |      |      |      |        |     | ++   |
| Glyma08g09900 | GmPAP15       |      |      |      |        |     |      |
| Glyma08g09910 | GmPAP16       |      |      |      | +      |     |      |
| Glyma08g40210 | GmPAP17       |      | +    |      |        |     |      |
| Glyma08g42670 | GmPAP18       |      |      |      |        | +   |      |
| Glyma08g46550 | GmPAP19       |      |      |      |        |     |      |
| Glyma09g36360 | GmPAP20       |      |      |      |        |     |      |
| Glyma10g08300 | GmPAP21       | +++  |      |      |        |     |      |
| Glyma11g36510 | GmPAP22       |      |      |      |        |     |      |
| Glyma12g01000 | GmPAP23       |      |      | +    |        |     |      |
| Glyma12g34960 | GmPAP24       |      |      |      |        |     |      |
| Glyma13g23090 | GmPAP25       |      |      |      | +      |     |      |
| Glyma13g35610 | GmPAP26       |      |      |      |        |     |      |
| Glyma14g02790 | GmPAP27       |      |      |      |        |     |      |
| Glyma17g11790 | GmPAP28       |      |      |      |        |     |      |
| Glyma18g00410 | GmPAP29       |      |      |      |        |     |      |
| Glyma18g17580 | GmPAP30       |      |      |      |        |     | ++   |
| Glyma19g03220 | GmPAP31       |      |      |      |        |     |      |
| Glyma19g37850 | GmPAP32       |      |      |      | +      |     |      |
| Glyma19g37860 | GmPAP33       |      |      |      |        |     | +    |
| Glyma20g01470 | GmPAP34       |      |      |      | ++++   |     |      |
| Glyma20g03260 | GmPAP35       |      |      |      |        |     |      |

The fold-change of the expression of the *GmPAP* genes were calculated, and the expressions were then classified into four groups according to their tissue specificity, denoted as follows: +, preferentially ( $\geq 2$ - and  $< 5$ -fold changes between the expression levels of the most highly expressed and second most highly expressed genes); ++, specifically ( $\geq 5$ - and  $< 10$ -fold changes); +++, very specifically ( $\geq 10$ - and  $< 25$ -fold changes); and +++, exclusively identified in one tissue ( $\geq 25$ -fold change) (Libault *et al.*, 2010. *The Plant Journal* **63**: 86–99).

TABLE S4. Quantitative real-time PCR analysis of expression levels of the *GmPAP* genes in different soybean tissues under different P treatments. Relative expression values are given.

| Proposed name  | Root         |              | Stem        |            | Leaf        |           | Flower     |            | Pod       |           | Seed       |               |
|----------------|--------------|--------------|-------------|------------|-------------|-----------|------------|------------|-----------|-----------|------------|---------------|
|                | LP           | HP           | LP          | HP         | LP          | HP        | LP         | HP         | LP        | HP        | LP         | HP            |
| <i>GmPAP1</i>  | 0.87±0.13    | 0.11±0.03    | 0.54±0.14   | 0.12±0.02  | 2.10±0.18   | 0.50±0.10 | 0.09±0.02  | 0.08±0.01  | 0.05±0.02 | 0.06±0.02 | 0.04±0.01  | 0.04±0.02     |
| <i>GmPAP2</i>  | 0.91±0.08    | 0.99±0.14    | 1.73±0.28   | 0.67±0.07  | 0.83±0.15   | 0.41±0.10 | 0.70±0.04  | 0.81±0.18  | 0.77±0.09 | 0.70±0.08 | 0.30±0.01  | 0.71±0.05     |
| <i>GmPAP3</i>  | 3.40±0.02    | 0.01±0.01    | 0.19±0.04   | 0.16±0.11  | 1.99±0.69   | 0.52±0.22 | 1.21±0.14  | 0.27±0.09  | 0.07±0.04 | 0.03±0.02 | 0.13±0.12  | 0.13±0.07     |
| <i>GmPAP4</i>  | 7.81±1.26    | 0.67±0.39    | 5.97±2.10   | 0.48±0.16  | 12.37±1.17  | 0.66±0.18 | 15.84±0.25 | 4.22±0.87  | 0.37±0.21 | 0.09±0.08 | 12.46±2.50 | 5.94±5.93     |
| <i>GmPAP5</i>  | 0.73±0.08    | 0.83±0.06    | 0.91±0.25   | 0.38±0.06  | 1.33±0.09   | 1.22±0.08 | 0.69±0.12  | 1.16±0.19  | 0.56±0.07 | 0.89±0.13 | 0.48±0.10  | 0.33±0.12     |
| <i>GmPAP6</i>  | 0.47±0.14    | 0.46±0.05    | 0.22±0.03   | 0.10±0.01  | 1.55±0.09   | 1.07±0.03 | 0.43±0.06  | 0.38±0.08  | 0.39±0.10 | 0.23±0.00 | 0.24±0.03  | 0.29±0.10     |
| <i>GmPAP7</i>  | 3.02±0.30    | 4.06±1.18    | 0.46±0.22   | 0.17±0.09  | 0.13±0.08   | 0.03±0.02 | 0.12±0.07  | 0.13±0.05  | 0.17±0.10 | 0.18±0.07 | 0.15±0.10  | 0.04±0.04     |
| <i>GmPAP8</i>  | 10.49±3.10   | 3.33±0.58    | 1.46±0.47   | 0.48±0.11  | 0.71±0.38   | 0.07±0.02 | 0.58±0.28  | 0.99±0.15  | 0.10±0.06 | 0.09±0.04 | 0.03±0.01  | 0.06±0.05     |
| <i>GmPAP9</i>  | 0.77±0.09    | 0.05±0.02    | 0.61±0.19   | 0          | 1.92±0.18   | 0.01±0.01 | 0.42±0.07  | 0.04±0.01  | 0.18±0.05 | 0         | 0.10±0.02  | 0.06±0.02     |
| <i>GmPAP10</i> | 6.17±0.18    | 0.10±0.05    | 0.23±0.16   | 0.08±0.02  | 3.22±0.68   | 0.16±0.04 | 2.63±0.56  | 0.61±0.26  | 0.41±0.10 | 0.11±0.04 | 0.97±0.33  | 0.29±0.16     |
| <i>GmPAP11</i> | 0.14±0.14    | 0.05±0.01    | 0.03±0.02   | 0          | 0.06±0.02   | 0         | 0.01±0.00  | 0.02±0.01  | 0         | 0         | 0          | 2.14±0.51     |
| <i>GmPAP12</i> | 0.06±0.02    | 0.02±0.00    | 0.56±0.16   | 0.01±0.01  | 1.99±0.11   | 0.29±0.05 | 0.79±0.26  | 0.30±0.06  | 0.05±0.02 | 0.08±0.02 | 0.02±0.01  | 0.03±0.02     |
| <i>GmPAP13</i> | 1.14±0.05    | 0.01±0.00    | 0.77±0.18   | 0.02±0.01  | 1.21±0.08   | 0         | 0.52±0.07  | 0.15±0.09  | 0.47±0.02 | 0.02±0.00 | 0.18±0.03  | 0.06±0.02     |
| <i>GmPAP14</i> | 133.24±42.54 | 107.16±42.70 | 29.17±11.87 | 20.96±3.94 | 75.78±25.42 | 4.01±2.50 | 9.63±2.80  | 10.90±0.84 | 0.78±0.78 | 8.68±2.04 | 7.62±3.54  | 805.79±248.70 |
| <i>GmPAP15</i> | 2.68±0.30    | 0            | 0.17±0.11   | 0.23±0.07  | 4.22±0.36   | 0.89±0.03 | 0.34±0.09  | 0.63±0.58  | 0.39±0.06 | 0.63±0.13 | 0.02±0.01  | 1.16±0.22     |
| <i>GmPAP16</i> | 0.51±0.01    | 0.03±0.01    | 0.02±0.01   | 0.02±0.01  | 0.12±0.01   | 0.04±0.01 | 0.47±0.03  | 0.09±0.00  | 0.05±0.01 | 0.01±0.01 | 0          | 0             |
| <i>GmPAP17</i> | 6.27±0.82    | 0            | 0.84±0.34   | 1.27±0.22  | 1.26±0.29   | 0.57±0.17 | 1.13±0.07  | 0.63±0.20  | 0.22±0.04 | 0.47±0.10 | 0.17±0.09  | 0.11±0.03     |
| <i>GmPAP18</i> | 1.42±0.77    | 0.26±0.13    | 2.38±0.13   | 1.32±0.07  | 1.09±0.40   | 1.24±0.12 | 0.86±0.02  | 0.34±0.07  | 1.49±0.30 | 3.02±0.19 | 0.37±0.19  | 0             |
| <i>GmPAP19</i> | 0.99±0.06    | 0.80±0.05    | 1.26±0.11   | 0.44±0.05  | 0.22±0.01   | 0.22±0.05 | 0.68±0.04  | 0.64±0.04  | 0.73±0.10 | 0.40±0.03 | 0.68±0.09  | 0.76±0.17     |
| <i>GmPAP20</i> | 3.23±0.45    | 0.10±0.01    | 0.90±0.19   | 0.05±0.01  | 1.42±0.12   | 0.23±0.03 | 0.57±0.03  | 0.19±0.06  | 0.21±0.03 | 0.13±0.01 | 0.09±0.01  | 0.17±0.07     |
| <i>GmPAP21</i> | 37.72±7.32   | 2.14±0.82    | 0.19±0.19   | 0.05±0.03  | 0.12±0.02   | 0.02±0.01 | 0.67±0.35  | 0.15±0.03  | 0.45±0.17 | 0.12±0.11 | 0          | 0             |
| <i>GmPAP22</i> | 0.20±0.07    | 0.15±0.05    | 0.12±0.05   | 0.10±0.05  | 0.11±0.10   | 0.44±0.13 | 1.80±0.35  | 1.30±0.29  | 0.13±0.03 | 0.40±0.09 | 1.19±0.48  | 1.09±0.10     |
| <i>GmPAP23</i> | 0.53±0.05    | 0.01±0.01    | 0.20±0.08   | 0.01±0.00  | 0.34±0.06   | 0.05±0.01 | 0.09±0.03  | 0.02±0.01  | 0.02±0.01 | 0.02±0.01 | 0.01±0.00  | 0.02±0.01     |
| <i>GmPAP24</i> | 0            | 0.08±0.04    | 0.04±0.02   | 0.02±0.01  | 0           | 0         | 0.01±0.00  | 0          | 0.01±0.01 | 0.11±0.10 | 0.47±0.31  | 0             |
| <i>GmPAP25</i> | 2.6±0.41     | 0.04±0.04    | 30.97±0.18  | 2.31±0.21  | 31.67±1.26  | 2.98±0.46 | 11.42±0.46 | 6.80±0.88  | 2.98±0.50 | 3.37±0.45 | 0.30±0.15  | 0.12±0.05     |

|                |           |           |           |           |           |           |           |           |           |           |           |           |
|----------------|-----------|-----------|-----------|-----------|-----------|-----------|-----------|-----------|-----------|-----------|-----------|-----------|
| <i>GmPAP26</i> | 0.11±0.07 | 0.37±0.08 | 1.05±0.18 | 1.50±0.05 | 0.34±0.10 | 0.46±0.17 | 0.67±0.09 | 0.89±0.04 | 0.29±0.05 | 0.74±0.14 | 1.33±0.11 | 1.99±0.43 |
| <i>GmPAP27</i> | 3.79±0.67 | 1.50±0.24 | 4.95±1.07 | 1.12±0.24 | 2.03±0.54 | 0.75±0.29 | 1.74±0.19 | 2.08±0.05 | 0.76±0.22 | 1.05±0.22 | 0.55±0.09 | 0         |
| <i>GmPAP28</i> | 1.64±0.19 | 0.69±0.06 | 2.10±0.4  | 0.68±0.07 | 1.91±0.03 | 0.89±0.09 | 1.40±0.16 | 1.01±0.08 | 0.87±0.15 | 1.30±0.21 | 0.33±0.04 | 0.13±0.08 |
| <i>GmPAP29</i> | 0.31±0.07 | 0.30±0.05 | 0.14±0.04 | 0.27±0.04 | 0.11±0.03 | 0.36±0.07 | 1.44±0.11 | 1.02±0.10 | 0.33±0.10 | 0.72±0.08 | 1.07±0.11 | 2.03±0.75 |
| <i>GmPAP30</i> | 0.33±0.19 | 0.13±0.03 | 0.17±0.07 | 0.16±0.07 | 0.39±0.09 | 0.14±0.02 | 0.12±0.04 | 0.10±0.03 | 0.05±0.01 | 0.16±0.08 | 0.25±0.17 | 1.17±0.49 |
| <i>GmPAP31</i> | 2.56±1.3  | 0         | 9.35±3.62 | 0.98±0.32 | 5.65±0.99 | 2.54±0.46 | 6.45±0.97 | 1.39±0.48 | 2.61±0.79 | 1.32±0.92 | 0.40±0.26 | 0.02±0.01 |
| <i>GmPAP32</i> | 0.70±0.08 | 0.03±0.01 | 0.94±0.23 | 0.04±0.01 | 2.91±0.06 | 0.04±0.01 | 0.50±0.01 | 0.14±0.02 | 0.04±0.02 | 0.01±0.00 | 0.03±0.01 | 0.02±0.01 |
| <i>GmPAP33</i> | 0.54±0.09 | 0.04±0.01 | 0.60±0.29 | 0.02±0.01 | 1.68±0.59 | 0.01±0.01 | 1.08±0.22 | 0.31±0.05 | 0.19±0.03 | 0.05±0.01 | 0.64±0.08 | 0.76±0.10 |
| <i>GmPAP34</i> | 0.13±0.06 | 0.12±0.02 | 0.01±0.00 | 0.02±0.01 | 0.63±0.24 | 0         | 4.50±0.99 | 4.20±0.74 | 0.04±0.04 | 0.09±0.04 | 0.03±0.02 | 0.03±0.01 |
| <i>GmPAP35</i> | 4.69±1.22 | 0.78±0.31 | 0.79±0.15 | 0.73±0.08 | 1.37±0.33 | 0.50±0.05 | 1.23±0.26 | 0.57±0.18 | 1.31±0.21 | 0.85±0.21 | 0.35±0.08 | 0.35±0.27 |

---
